# Supplementary material
Source: Springer Nature journal article supplement (https://www.springermedizin.de/resource/supplementary/13256_2013_2748_MOESM1_ESM.pdf/9650424)

**A**

C A A C T A C C T C A T A T T C C A T T C  
433 439 445

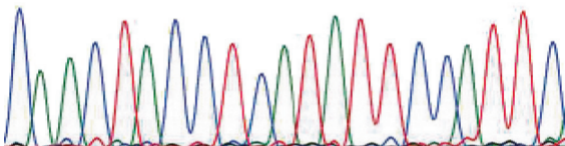**B**

C A A C T A C C T N A N A T T C C A T T C  
433 439 445 4

c.3647C>A

p.Ser1216X

c.3649T>A

p.Tyr1217Asn

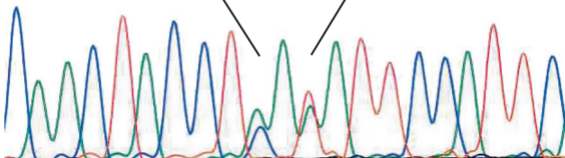

Supplement: MOESM1 [file 9650424]
